# Supplementary material for: Computer-Aided Screening of Phytoconstituents from Ocimum tenuiflorum against Diabetes Mellitus Targeting DPP4 Inhibition: A Combination of Molecular Docking, Molecular Dynamics, and Pharmacokinetics Approaches
Source: MDPI journal article supplement (doi:10.3390/molecules27165133), 2022-08-12
Supplement: s1 [file s1]

Supplementary Material

Supplementary Table S1: ADMET profiling of *O. tenuiflorum* phytochemicals

| Sl. No | Compound Names                                         | Oral<br>bioavailability<br>(OB≥30%) | Blood-brain<br>barrier<br>(BBB) | Drug half-<br>life<br>(HL<3h) | Lipinski's<br>rule (LR) of<br>five | Intestinal<br>epithelial<br>permeability<br>(Caco-2 cells) | Drug-<br>induced<br>liver<br>injury<br>(DILI) | Clearness<br>(CL>15<br>ml/min/kg) | Molecular<br>Weight (MW<br>100~600) | Hydrogen<br>bond<br>acceptor<br>(0~12) | Hydrogen<br>bond donor<br>(0~7) | TPSA<br>(0~140) | PAINS   |
|--------|--------------------------------------------------------|-------------------------------------|---------------------------------|-------------------------------|------------------------------------|------------------------------------------------------------|-----------------------------------------------|-----------------------------------|-------------------------------------|----------------------------------------|---------------------------------|-----------------|---------|
| 1      | Cyclo (L-val-L-Leu)                                    | Pass                                | Pass                            | 0.671                         | Accepted                           | -4.711                                                     | Negative                                      | 5.356                             | 212.150                             | 4                                      | 2                               | 58.200          | 0       |
| 2      | α-Cubebene                                             | Fail                                | Pass                            | 0.052                         | Accepted                           | -4.408                                                     | Negative                                      | 18.693                            | 204.190                             | 0                                      | 0                               | 0.000           | 0       |
| 3      | β-Caryophyllone                                        | Moderate                            | Pass                            | 0.227                         | Accepted                           | -4.750                                                     | Negative                                      | 14.774                            | 220.180                             | 1                                      | 0                               | 17.070          | 0       |
| 4      | Phytosterols                                           | Pass                                | Pass                            | 0.013                         | Accepted                           | -4.756                                                     | Negative                                      | 16.686                            | 414.390                             | 1                                      | 1                               | 20.230          | 0       |
| 5      | UNII-0V56HXQ8N5                                        | Moderate                            | Moderate                        | 0.059                         | Accepted                           | -4.357                                                     | Negative                                      | 19.832                            | 204.190                             | 0                                      | 0                               | 0.000           | 0       |
| 6      | (-)-Alloaromadendrene                                  | Pass                                | Pass                            | 0.040                         | Accepted                           | -4.577                                                     | Negative                                      | 13.563                            | 204.190                             | 0                                      | 0                               | 0.000           | 0       |
| 7      | (-)-Camphene                                           | Pass                                | Pass                            | 0.077                         | Accepted                           | -4.463                                                     | Negative                                      | 9.346                             | 136.130                             | 0                                      | 0                               | 0.000           | 0       |
| 8      | (-)-Cis-Carveol                                        | Fail                                | Pass                            | 0.378                         | Accepted                           | -4.328                                                     | Negative                                      | 12.624                            | 152.120                             | 1                                      | 1                               | 20.230          | 0       |
| 9      | (-)-Linalool                                           | Pass                                | Pass                            | 0.493                         | Accepted                           | -4.375                                                     | Negative                                      | 9.738                             | 154.140                             | 1                                      | 1                               | 20.230          | 0       |
| 10     | (+)-α-phellandrene                                     | Pass                                | Pass                            | 0.617                         | Accepted                           | -4.383                                                     | Negative                                      | 12.660                            | 136.130                             | 0                                      | 0                               | 0.000           | 0       |
| 11     | (+)-δ-cadinene                                         | Moderate                            | Moderate                        | 0.051                         | Accepted                           | -4.469                                                     | Positive                                      | 7.421                             | 204.190                             | 0                                      | 0                               | 0.000           | 0       |
| 12     | (+)-Endo-β-bergamotene                                 | Pass                                | Pass                            | 0.063                         | Accepted                           | -4.466                                                     | Negative                                      | 16.946                            | 204.190                             | 0                                      | 0                               | 0.000           | 0       |
| 13     | (1S,2R,4S)-(-)-Bornyl acetate                          | Pass                                | Pass                            | 0.243                         | Accepted                           | -4.552                                                     | Moderate                                      | 6.063                             | 196.150                             | 2                                      | 0                               | 26.300          | 0       |
| 14     | (1S)-1,7,7-<br>Trimethylbicyclo[2.2.1]heptan-2-<br>one | Pass                                | Pass                            | 0.701                         | Accepted                           | -4.582                                                     | Negative                                      | 13.808                            | 152.120                             | 1                                      | 0                               | 17.070          | 0       |
| 15     | (E)-β-Farnesene                                        | Fail                                | Fail                            | 0.156                         | Accepted                           | -4.537                                                     | Moderate                                      | 13.186                            | 204.190                             | 0                                      | 0                               | 0.000           | 0       |
| 16     | (E)-α-bisabolene                                       | Fail                                | Fail                            | 0.092                         | Accepted                           | -4.502                                                     | Negative                                      | 17.581                            | 204.190                             | 0                                      | 0                               | 0.000           | 0       |
| 17     | (E)-β-Ocimene                                          | Pass                                | Pass                            | 0.678                         | Accepted                           | -4.434                                                     | Negative                                      | 14.171                            | 136.130                             | 0                                      | 0                               | 0.000           | 0       |
| 18     | 1-Octen-3-ol                                           | Fail                                | Fail                            | 0.672                         | Accepted                           | -4.256                                                     | Negative                                      | 7.650                             | 128.120                             | 1                                      | 1                               | 20.230          | 0       |
| 19     | 1S-α-Pinene                                            | Pass                                | Pass                            | 0.114                         | Accepted                           | -4.303                                                     | Negative                                      | 15.022                            | 136.130                             | 0                                      | 0                               | 0.000           | 0       |
| 20     | 2,3-Dimethylaniline                                    | Pass                                | Pass                            | 0.583                         | Accepted                           | -4.255                                                     | Negative                                      | 10.496                            | 121.090                             | 1                                      | 2                               | 26.020          | 0       |
| 21     | 2,5-Dimethoxybenzoic acid                              | Pass                                | Moderate                        | 0.885                         | Accepted                           | -4.853                                                     | Positive                                      | 7.488                             | 182.060                             | 4                                      | 1                               | 55.760          | 0       |
| 22     | 3-Carene                                               | Pass                                | Pass                            | 0.132                         | Accepted                           | -4.307                                                     | Negative                                      | 16.061                            | 136.130                             | 0                                      | 0                               | 0.000           | 0       |
| 23     | 4-Terpineol                                            | Pass                                | Pass                            | 0.447                         | Accepted                           | -4.217                                                     | Negative                                      | 14.345                            | 154.140                             | 1                                      | 1                               | 20.230          | 0       |
| 24     | Acetic acid                                            | Pass                                | Pass                            | 0.791                         | Accepted                           | -5.218                                                     | Negative                                      | 1.609                             | 60.020                              | 2                                      | 1                               | 37.300          | 0       |
| 25     | Acetylcoumarin                                         | Pass                                | Pass                            | 0.843                         | Accepted                           | -4.453                                                     | Moderate                                      | 8.457                             | 206.090                             | 3                                      | 0                               | 35.530          | 0       |
| 26     | α-Fenchene                                             | Pass                                | Pass                            | 0.099                         | Accepted                           | -4.460                                                     | Negative                                      | 10.559                            | 136.130                             | 0                                      | 0                               | 0.000           | 0       |
| 27     | α-Humulene                                             | Fail                                | No                              | 0.095                         | Accepted                           | -4.425                                                     | Negative                                      | 8.432                             | 204.190                             | 0                                      | 0                               | 0.000           | 0       |
| 28     | α-Terpineol                                            | Pass                                | Pass                            | 0.527                         | Accepted                           | -4.193                                                     | Negative                                      | 8.942                             | 154.140                             | 1                                      | 1                               | 20.230          | 0       |
| 29     | Apigenin                                               | Fail                                | No                              | 0.856                         | Accepted                           | -4.847                                                     | Positive                                      | 7.022                             | 270.050                             | 5                                      | 3                               | 90.900          | 0       |
| 30     | Apigenin 7-glucuronide                                 | Fail                                | No                              | 0.715                         | Rejected                           | -6.376                                                     | Positive                                      | 1.194                             | 446.080                             | 11                                     | 6                               | 187.120         | 0       |
| 31     | β-cadinene                                             | Fail                                | Moderate                        | 0.060                         | Accepted                           | -4.392                                                     | Negative                                      | 17.975                            | 204.190                             | 0                                      | 0                               | 0.000           | 0       |
| 32     | β-Carotene                                             | Moderate                            | No                              | 0.076                         | Rejected                           | -6.003                                                     | Negative                                      | 0.229                             | 536.440                             | 0                                      | 0                               | 0.000           | 0       |
| 33     | β-Caryophyllene                                        | Pass                                | Pass                            | 0.048                         | Accepted                           | -4.517                                                     | Negative                                      | 9.943                             | 204.190                             | 0                                      | 0                               | 0.000           | 0       |
| 34     | β-Pinene                                               | Pass                                | Pass                            | 0.107                         | Accepted                           | -4.460                                                     | Negative                                      | 10.097                            | 136.130                             | 0                                      | 0                               | 0.000           | 0       |
| 35     | Bis-acetic acid                                        | Fail                                | No                              | 0.998                         | Rejected                           | -7.722                                                     | Positive                                      | 12.869                            | 1700.170                            | 46                                     | 25                              | 777.980         | 1 alert |
| 36     | Carotene                                               | Pass                                | No                              | 0.036                         | Rejected                           | -5.634                                                     | Negative                                      | 0.671                             | 536.440                             | 0                                      | 0                               | 0.000           | 0       |
| 37     | Carvacrol                                              | Fail                                | Pass                            | 0.671                         | Accepted                           | -4.436                                                     | Negative                                      | 11.335                            | 150.100                             | 1                                      | 1                               | 20.230          | 1 alert |
| 38     | Cis-Anethole                                           | Pass                                | Moderate                        | 0.638                         | Accepted                           | -4.440                                                     | Negative                                      | 11.146                            | 148.090                             | 1                                      | 0                               | 9.230           | 0       |
| 39     | Decanal                                                | Fail                                | Pass                            | 0.456                         | Accepted                           | -4.551                                                     | Negative                                      | 5.049                             | 156.150                             | 1                                      | 0                               | 17.070          | 0       |

|    |                            |          |          |       |          |        |          |        |         |    |   |         |         |
|----|----------------------------|----------|----------|-------|----------|--------|----------|--------|---------|----|---|---------|---------|
| 40 | Dehydro-p-cymene           | Pass     | Pass     | 0.568 | Accepted | -4.344 | Moderate | 10.755 | 132.090 | 0  | 0 | 0.000   | 0       |
| 41 | Dipentene                  | Fail     | Pass     | 0.233 | Accepted | -4.320 | Negative | 11.517 | 136.130 | 0  | 0 | 0.000   | 0       |
| 42 | Estragole                  | Moderate | Moderate | 0.577 | Accepted | -4.308 | Negative | 12.054 | 148.090 | 1  | 0 | 9.230   | 0       |
| 43 | Eucalyptol                 | Pass     | Pass     | 0.352 | Accepted | -4.414 | Negative | 8.066  | 154.140 | 1  | 0 | 9.230   | 0       |
| 44 | Eugenol                    | Fail     | Pass     | 0.887 | Accepted | -4.373 | Negative | 14.042 | 164.080 | 2  | 1 | 29.460  | 0       |
| 45 | $\gamma$ -Selinene         | Pass     | Pass     | 0.088 | Accepted | -4.577 | Negative | 13.350 | 204.190 | 0  | 0 | 0.000   | 0       |
| 46 | Geranyl acetate            | Pass     | Pass     | 0.506 | Accepted | -4.420 | Moderate | 9.707  | 196.150 | 2  | 0 | 26.300  | 0       |
| 47 | Isoeugenol                 | Pass     | Moderate | 0.880 | Accepted | -4.579 | Negative | 13.435 | 164.080 | 2  | 1 | 29.460  | 0       |
| 48 | L-ascorbic acid            | Fail     | Fail     | 0.928 | Accepted | -5.917 | Positive | 9.964  | 176.030 | 6  | 5 | 114.290 | 0       |
| 49 | Linolenic acid             | Fail     | Fail     | 0.710 | Accepted | -4.631 | Negative | 4.877  | 278.220 | 2  | 1 | 37.300  | 0       |
| 50 | Luteolin-7-O-glucuronide   | Fail     | Fail     | 0.855 | Rejected | -6.471 | Positive | 1.614  | 462.080 | 12 | 7 | 207.350 | 1 alert |
| 51 | Methyleugenol              | Moderate | Pass     | 0.848 | Accepted | -4.338 | Negative | 11.466 | 178.100 | 2  | 0 | 18.460  | 0       |
| 52 | Molludistin                | Fail     | Fail     | 0.290 | Accepted | -5.776 | Positive | 3.398  | 416.110 | 9  | 5 | 149.820 | 0       |
| 53 | Myrcene                    | Pass     | Pass     | 0.453 | Accepted | -4.402 | Moderate | 13.108 | 136.130 | 0  | 0 | 0.000   | 0       |
| 54 | Nerol                      | Fail     | Pass     | 0.737 | Accepted | -4.299 | Positive | 12.604 | 154.140 | 1  | 1 | 20.230  | 0       |
| 55 | Octadeca-9,12-dienoic acid | Moderate | Fail     | 0.628 | Accepted | -4.733 | Negative | 3.327  | 280.240 | 2  | 1 | 37.300  | 0       |
| 56 | Octadecanoate              | Fail     | Fail     | 0.476 | Accepted | -5.068 | Negative | 2.425  | 284.270 | 2  | 1 | 37.300  | 0       |
| 57 | Oleic acid                 | Moderate | Fail     | 0.546 | Accepted | -4.922 | Negative | 2.573  | 282.260 | 2  | 1 | 37.300  | 0       |
| 58 | Orientin                   | Fail     | Fail     | 0.724 | Rejected | -6.208 | Positive | 5.042  | 448.100 | 11 | 8 | 201.280 | 1 alert |
| 59 | Palmitic acid              | Fail     | Fail     | 0.610 | Accepted | -5.027 | Negative | 2.377  | 256.240 | 2  | 1 | 37.300  | 0       |
| 60 | Thymol                     | Fail     | Pass     | 0.682 | Accepted | -4.387 | Negative | 9.444  | 150.100 | 1  | 1 | 20.230  | 0       |
| 61 | Ursolic acid               | Moderate | Pass     | 0.017 | Accepted | -5.221 | Negative | 3.671  | 456.360 | 3  | 2 | 57.530  | 0       |

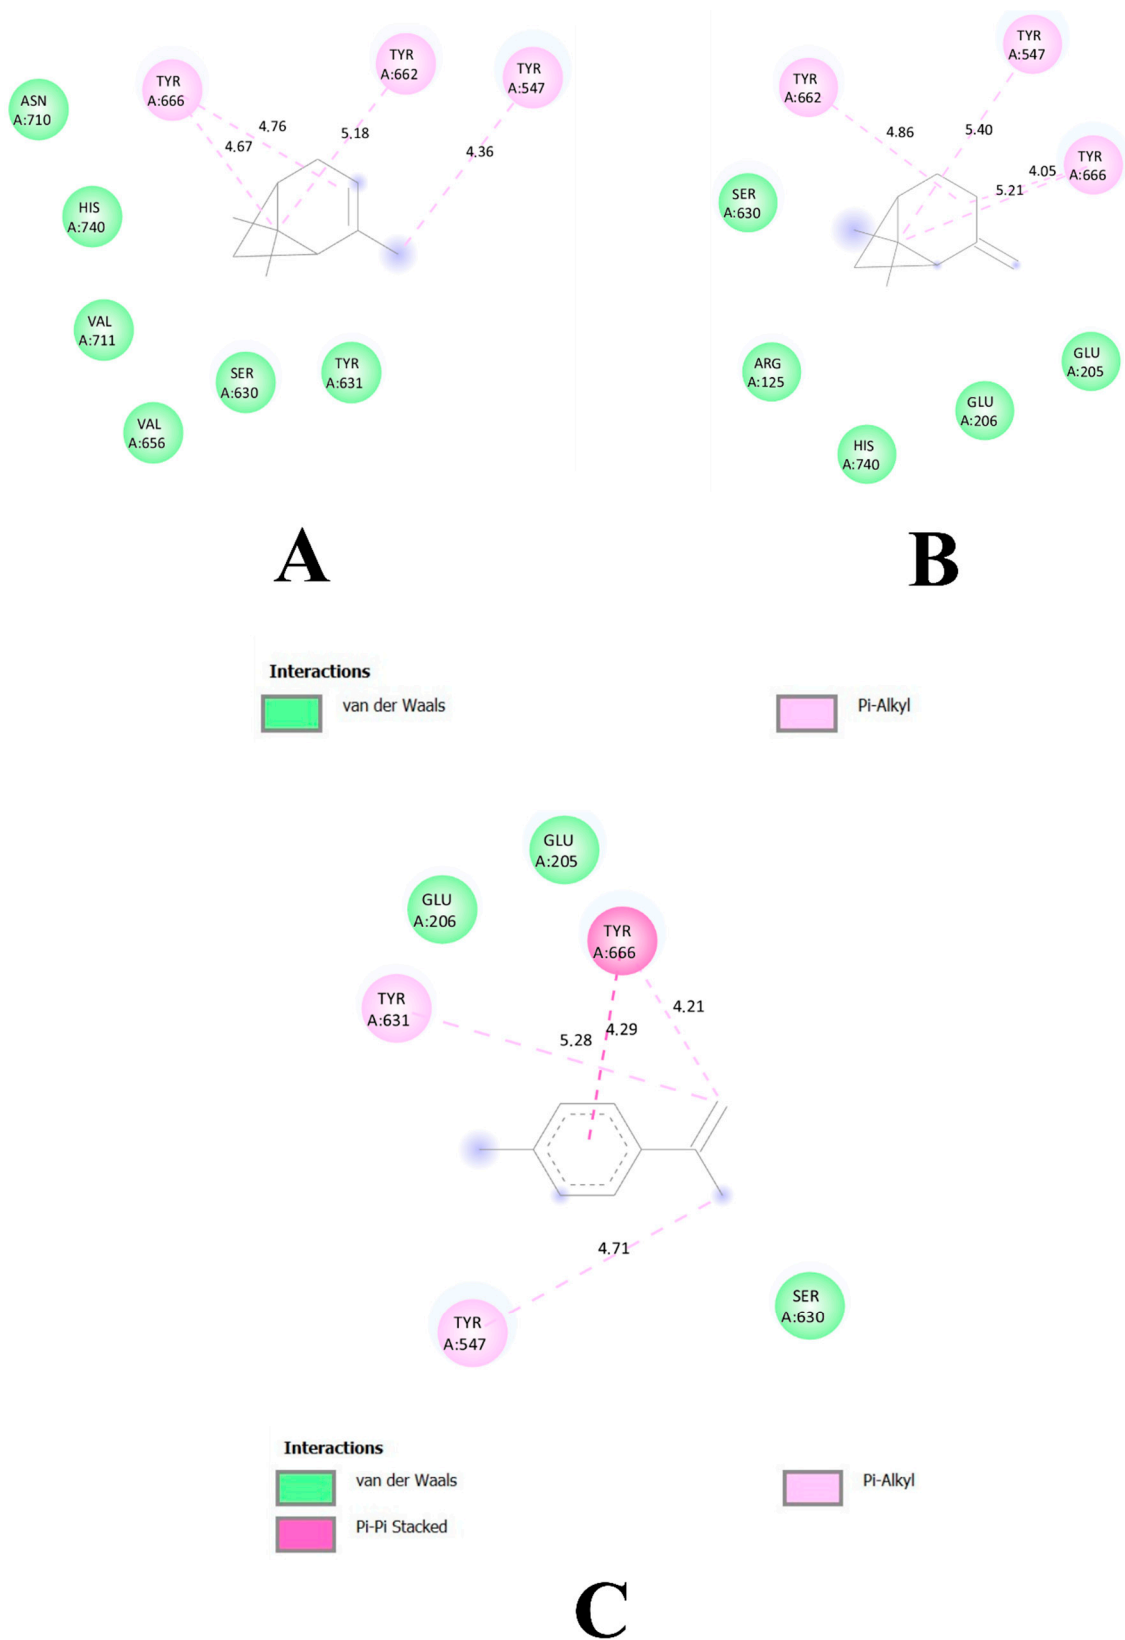

**Supplementary Figure S1:** Binding interactions of (A) 1S- $\alpha$ -pinene (binding affinity: -5.3 kcal/mol), (B)  $\beta$ -pinene (binding affinity: -5.2 kcal/mol), and (C) Dehydro-p-cymene (binding affinity: -5.5 kcal/mol) with DPP4 protein.

**Supplementary Table S2:** Comparative account of binding interactions during molecular docking and dynamics simulation studies conducted for experimental compounds.

| Compounds            | Binding interactions during molecular docking simulation | Binding interactions during molecular dynamics simulation |
|----------------------|----------------------------------------------------------|-----------------------------------------------------------|
| 1S- $\alpha$ -pinene | Tyr666, Val656, Tyr631, Trp659, Tyr662                   | Tyr666, Tyr662, Phe357, Ser657, Tyr547,                   |
| $\beta$ -pinene      | Tyr666, Val656, Tyr631, Trp659, Tyr662                   | Tyr666, Tyr662, Ser 630, Asp663, Ser657, Tyr547           |
| Dehydro-p-cymene     | Tyr666, Val656, Val711, Phe357, Tyr631, Trp659, Tyr662   | Tyr666, Trp659, Phe357, Ser657, Glu668, Ser630            |
| Saxagliptin          | Tyr547, Tyr662, Tyr666, Glu206                           | Tyr666, Tyr547, His740, Phe357, Ser630                    |

**Supplementary Table S3:** Common binding interactions observed between molecular docking and dynamics simulation studies conducted for experimental compounds.

| Compounds            | Common binding interactions |
|----------------------|-----------------------------|
| 1S- $\alpha$ -pinene | Tyr666 and Tyr662           |
| $\beta$ -pinene      | Tyr666 and Tyr662           |
| Dehydro-p-cymene     | Tyr666 and Trp659           |
| Saxagliptin          | Tyr666 and Tyr547           |
